# Supplementary material for: Pan-cancer analysis of homozygous deletions in primary tumours uncovers rare tumour suppressors
Source: PubMed Central journal article supplement (PMC5663922; doi:10.1038/s41467-017-01355-0), 2017-10-31
Supplement: 41467_2017_1355_MOESM2_ESM.pdf [file 41467_2017_1355_MOESM2_ESM.pdf]

## **Description of Additional Supplementary Files**

File Name: Supplementary Data 1

Description: List of samples included in this study

File Name: Supplementary Data 2

Description: List of homozygous deletions identified in this study

File Name: Supplementary Data 3

Description: Results of permutation analyses to identify regions with excess homozygous deletions
